# Supplementary material for: CCR9 Antagonists in the Treatment of Ulcerative Colitis
Source: Hindawi journal article supplement (doi:10.1155/2015/628340), 2015-01-01
Supplement: f1 [file 628340.f1.pdf]

## Supplementary Materials:

Fig. S1. CCX025 is a potent inhibitor of CCR9-mediated cell migration in vitro and in vivo.

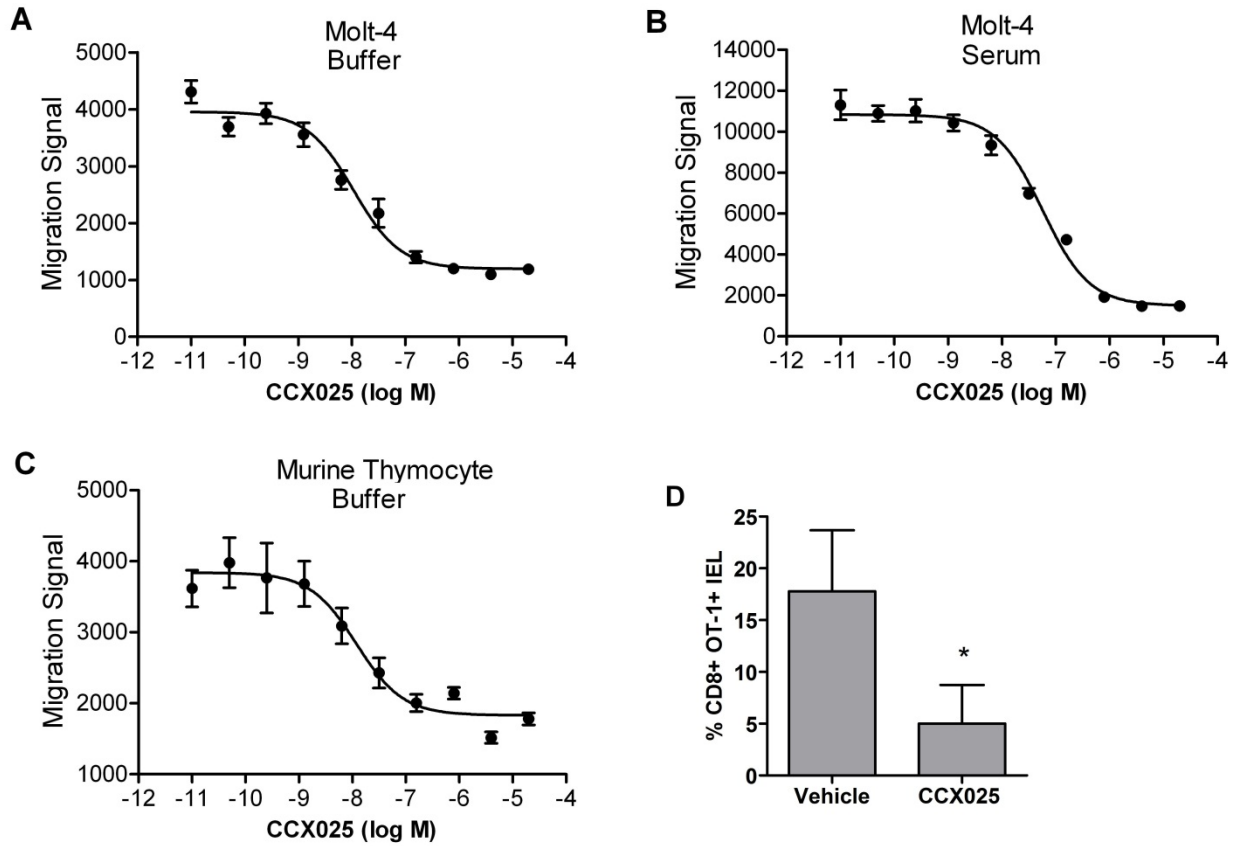

**Fig. S1.** CCX025 is a potent inhibitor of CCR9-mediated cell migration in vitro and in vivo. (**A**-**B**): CCX025 blocks the chemotaxis of human Molt-4 cells to 80 nM CCL25 in buffer (**A**) and 100% human serum (**B**) with  $IC_{50}$  values of 23 nM (n=9) and 78 nM (n=6), respectively. (**C**): CCX025 blocks the chemotaxis of mouse thymocytes to 80 nM CCL25 in buffer with an  $IC_{50}$  value of 12 nM. (**D**): CCX025 blocks the migration of adoptively-transferred ovalbumin-specific OT-1 T CD8<sup>+</sup> T cells to the small intestine after oral gavage with ovalbumin.
